# Supplementary material
Source: MDPI journal article supplement (https://www.mdpi.com/2673-4583/14/1/10)
Supplement: s1 [file s1]

**Table S1.** Experimental details of the X-ray diffraction analysis

|                                                                                                                |                                                                                                                                                                                                                                                                                |
|----------------------------------------------------------------------------------------------------------------|--------------------------------------------------------------------------------------------------------------------------------------------------------------------------------------------------------------------------------------------------------------------------------|
| Crystal data                                                                                                   |                                                                                                                                                                                                                                                                                |
| Chemical formula                                                                                               | C <sub>6</sub> H <sub>6</sub> N <sub>2</sub> O                                                                                                                                                                                                                                 |
| Mr                                                                                                             | 122.13                                                                                                                                                                                                                                                                         |
| Crystal system, space group                                                                                    | Monoclinic, <i>P</i> 2 <sub>1</sub> / <i>m</i>                                                                                                                                                                                                                                 |
| Temperature (K)                                                                                                | 295(2)                                                                                                                                                                                                                                                                         |
| <i>a</i> , <i>b</i> , <i>c</i> (Å)                                                                             | 6.798 (3), 6.172 (3), 8.844 (5)                                                                                                                                                                                                                                                |
| β (°)                                                                                                          | 110.30 (5)                                                                                                                                                                                                                                                                     |
| <i>V</i> (Å <sup>3</sup> )                                                                                     | 348.0 (3)                                                                                                                                                                                                                                                                      |
| <i>Z</i>                                                                                                       | 2                                                                                                                                                                                                                                                                              |
| Radiation type                                                                                                 | MoKα                                                                                                                                                                                                                                                                           |
| μ (mm <sup>-1</sup> )                                                                                          | 0.08                                                                                                                                                                                                                                                                           |
| Crystal size (mm)                                                                                              | 0.55 × 0.40 × 0.35                                                                                                                                                                                                                                                             |
| Diffractometer                                                                                                 | New Xcalibur, Ruby diffractometer                                                                                                                                                                                                                                              |
| Absorption correction                                                                                          | Multi-scan<br><i>CrysAlis PRO</i> , Agilent Technologies, Version 1.171.37.33 (release 27-03-2014 <i>CrysAlis171 .NET</i> ) (compiled Mar 27 2014,17:12:48) Empirical absorption correction using spherical harmonics, implemented in <i>SCALE3 ABSPACK</i> scaling algorithm. |
| No. of measured, independent, and observed [ <i>I</i> > 2σ( <i>I</i> )] reflections                            | 1510, 889, 478                                                                                                                                                                                                                                                                 |
| <i>R</i> <sub>int</sub>                                                                                        | 0.018                                                                                                                                                                                                                                                                          |
| (sin θ/λ) <sub>max</sub> (Å <sup>-1</sup> )                                                                    | 0.690                                                                                                                                                                                                                                                                          |
| Refinement                                                                                                     |                                                                                                                                                                                                                                                                                |
| <i>R</i> [ <i>F</i> <sup>2</sup> > 2σ( <i>F</i> <sup>2</sup> )], <i>wR</i> ( <i>F</i> <sup>2</sup> ), <i>S</i> | 0.063, 0.217, 1.06                                                                                                                                                                                                                                                             |
| No. of reflections                                                                                             | 889                                                                                                                                                                                                                                                                            |
| No. of parameters                                                                                              | 61                                                                                                                                                                                                                                                                             |
| H-atom treatment                                                                                               | H-atom parameters constrained                                                                                                                                                                                                                                                  |
| Δ <i>Q</i> <sub>max</sub> , Δ <i>Q</i> <sub>min</sub> (e Å <sup>-3</sup> )                                     | 0.14, -0.26                                                                                                                                                                                                                                                                    |
